# Supplementary material for: Analysis of Faster-Than-Real-Time (FTRT) Tsunami Simulations for the Spanish Tsunami Warning System for the Atlantic
Source: MDPI journal article supplement (doi:10.3390/geohazards3030019), 2022-07-01
Supplement: s1 [file s1]

Archive with 1 entries (1 files):
- geohazards-1641419-supplementary.pdf
