# Supplementary material for: Analysis of Faster-Than-Real-Time (FTRT) Tsunami Simulations for the Spanish Tsunami Warning System for the Atlantic
Source: MDPI journal article supplement (doi:10.3390/geohazards3030019), 2022-07-01
Supplement: s1 [file s1 › geohazards-1641419-supplementary.pdf]

## Supplementary Material

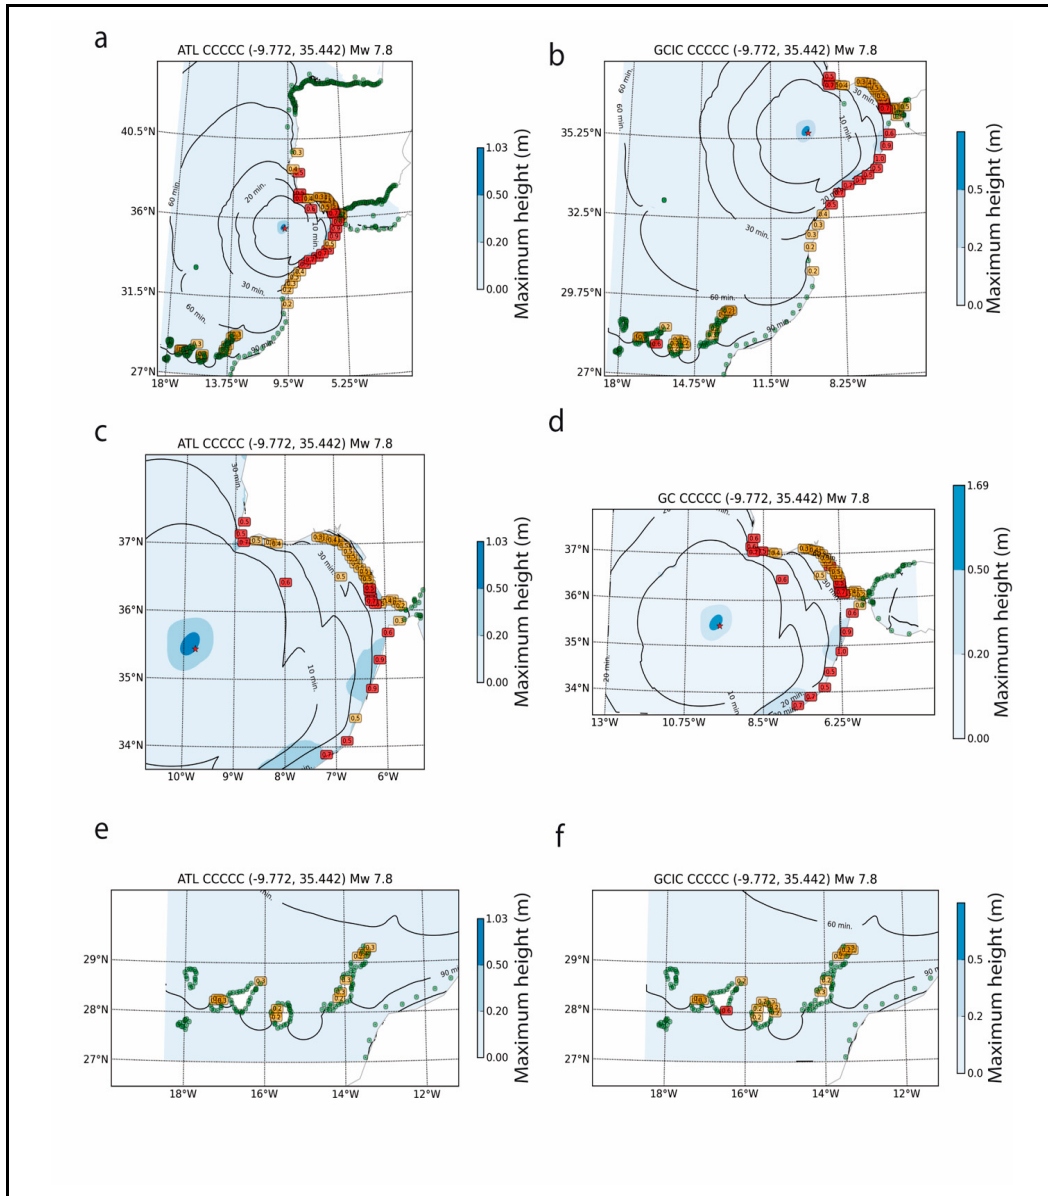

**Figure S1.** Comparison of maximum heights at FPCs of scenario of reference computing tsunami propagation with different resolution domains. (a,c,e) ATL at 1/2 arcmin (b,f) GCIC at 1/4 arcmin, and (d) GC at 1/8 arcmin.
